# Supplementary material for: Quantitative Transcriptomics Reveals the Growth- and Nutrient-Dependent Response of a Streamlined Marine Methylotroph to Methanol and Naturally Occurring Dissolved Organic Matter
Source: PubMed Central journal article supplement (PMC5120137; doi:10.1128/mbio.01279-16), 2016-11-22
Supplement: mbo006163064sf1.pdf [file mbo006163064sf1.pdf]

Figure S1.

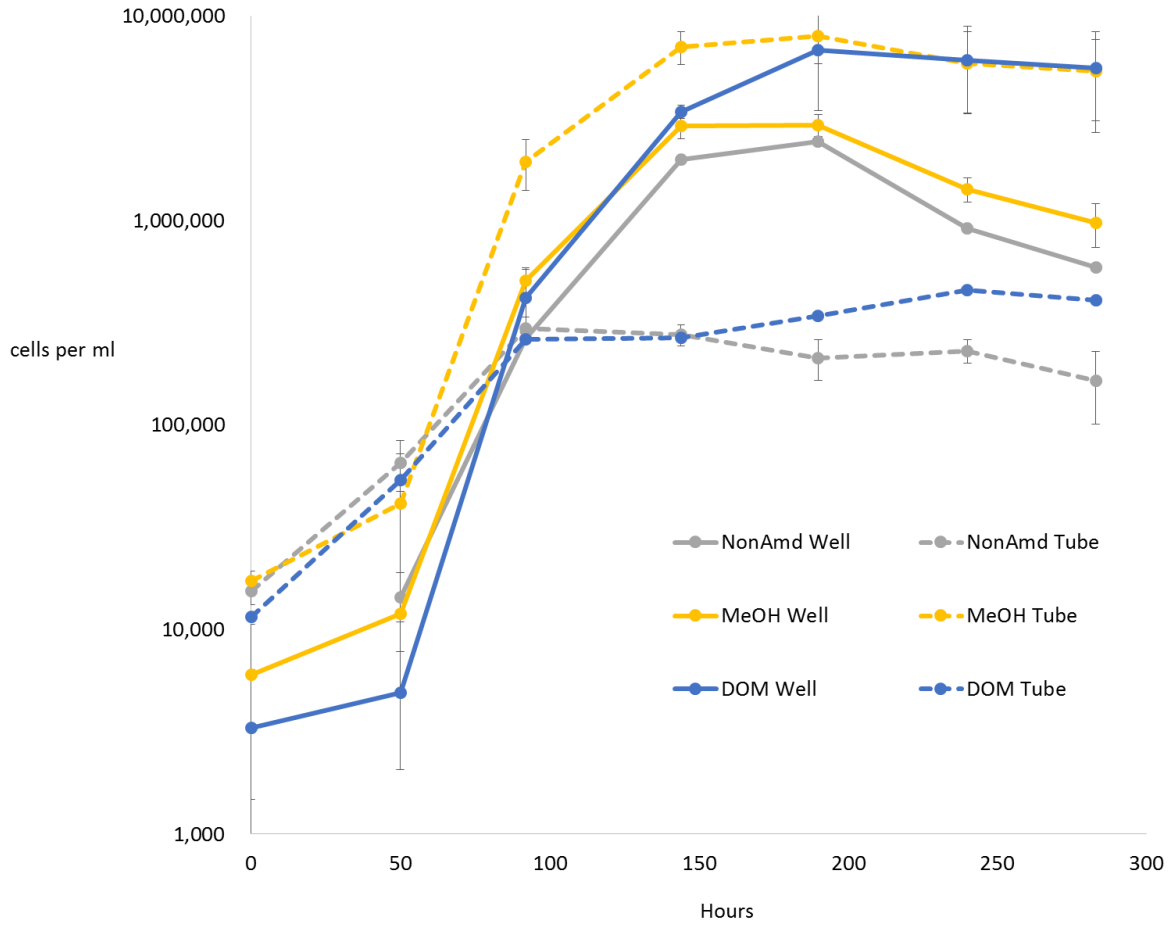

Strain NB0046 growth in seawater medium amended with vitamins and inorganic nutrients and in different sized cultivation chambers. 'Well' = 1ml of culture in a 2ml well in a 48-well polycarbonate plate. 'Tube' = 8 ml of culture in a 10ml polycarbonate test tube.
