# Supplementary material for: Quantitative Transcriptomics Reveals the Growth- and Nutrient-Dependent Response of a Streamlined Marine Methylotroph to Methanol and Naturally Occurring Dissolved Organic Matter
Source: PubMed Central journal article supplement (PMC5120137; doi:10.1128/mbio.01279-16), 2016-11-22

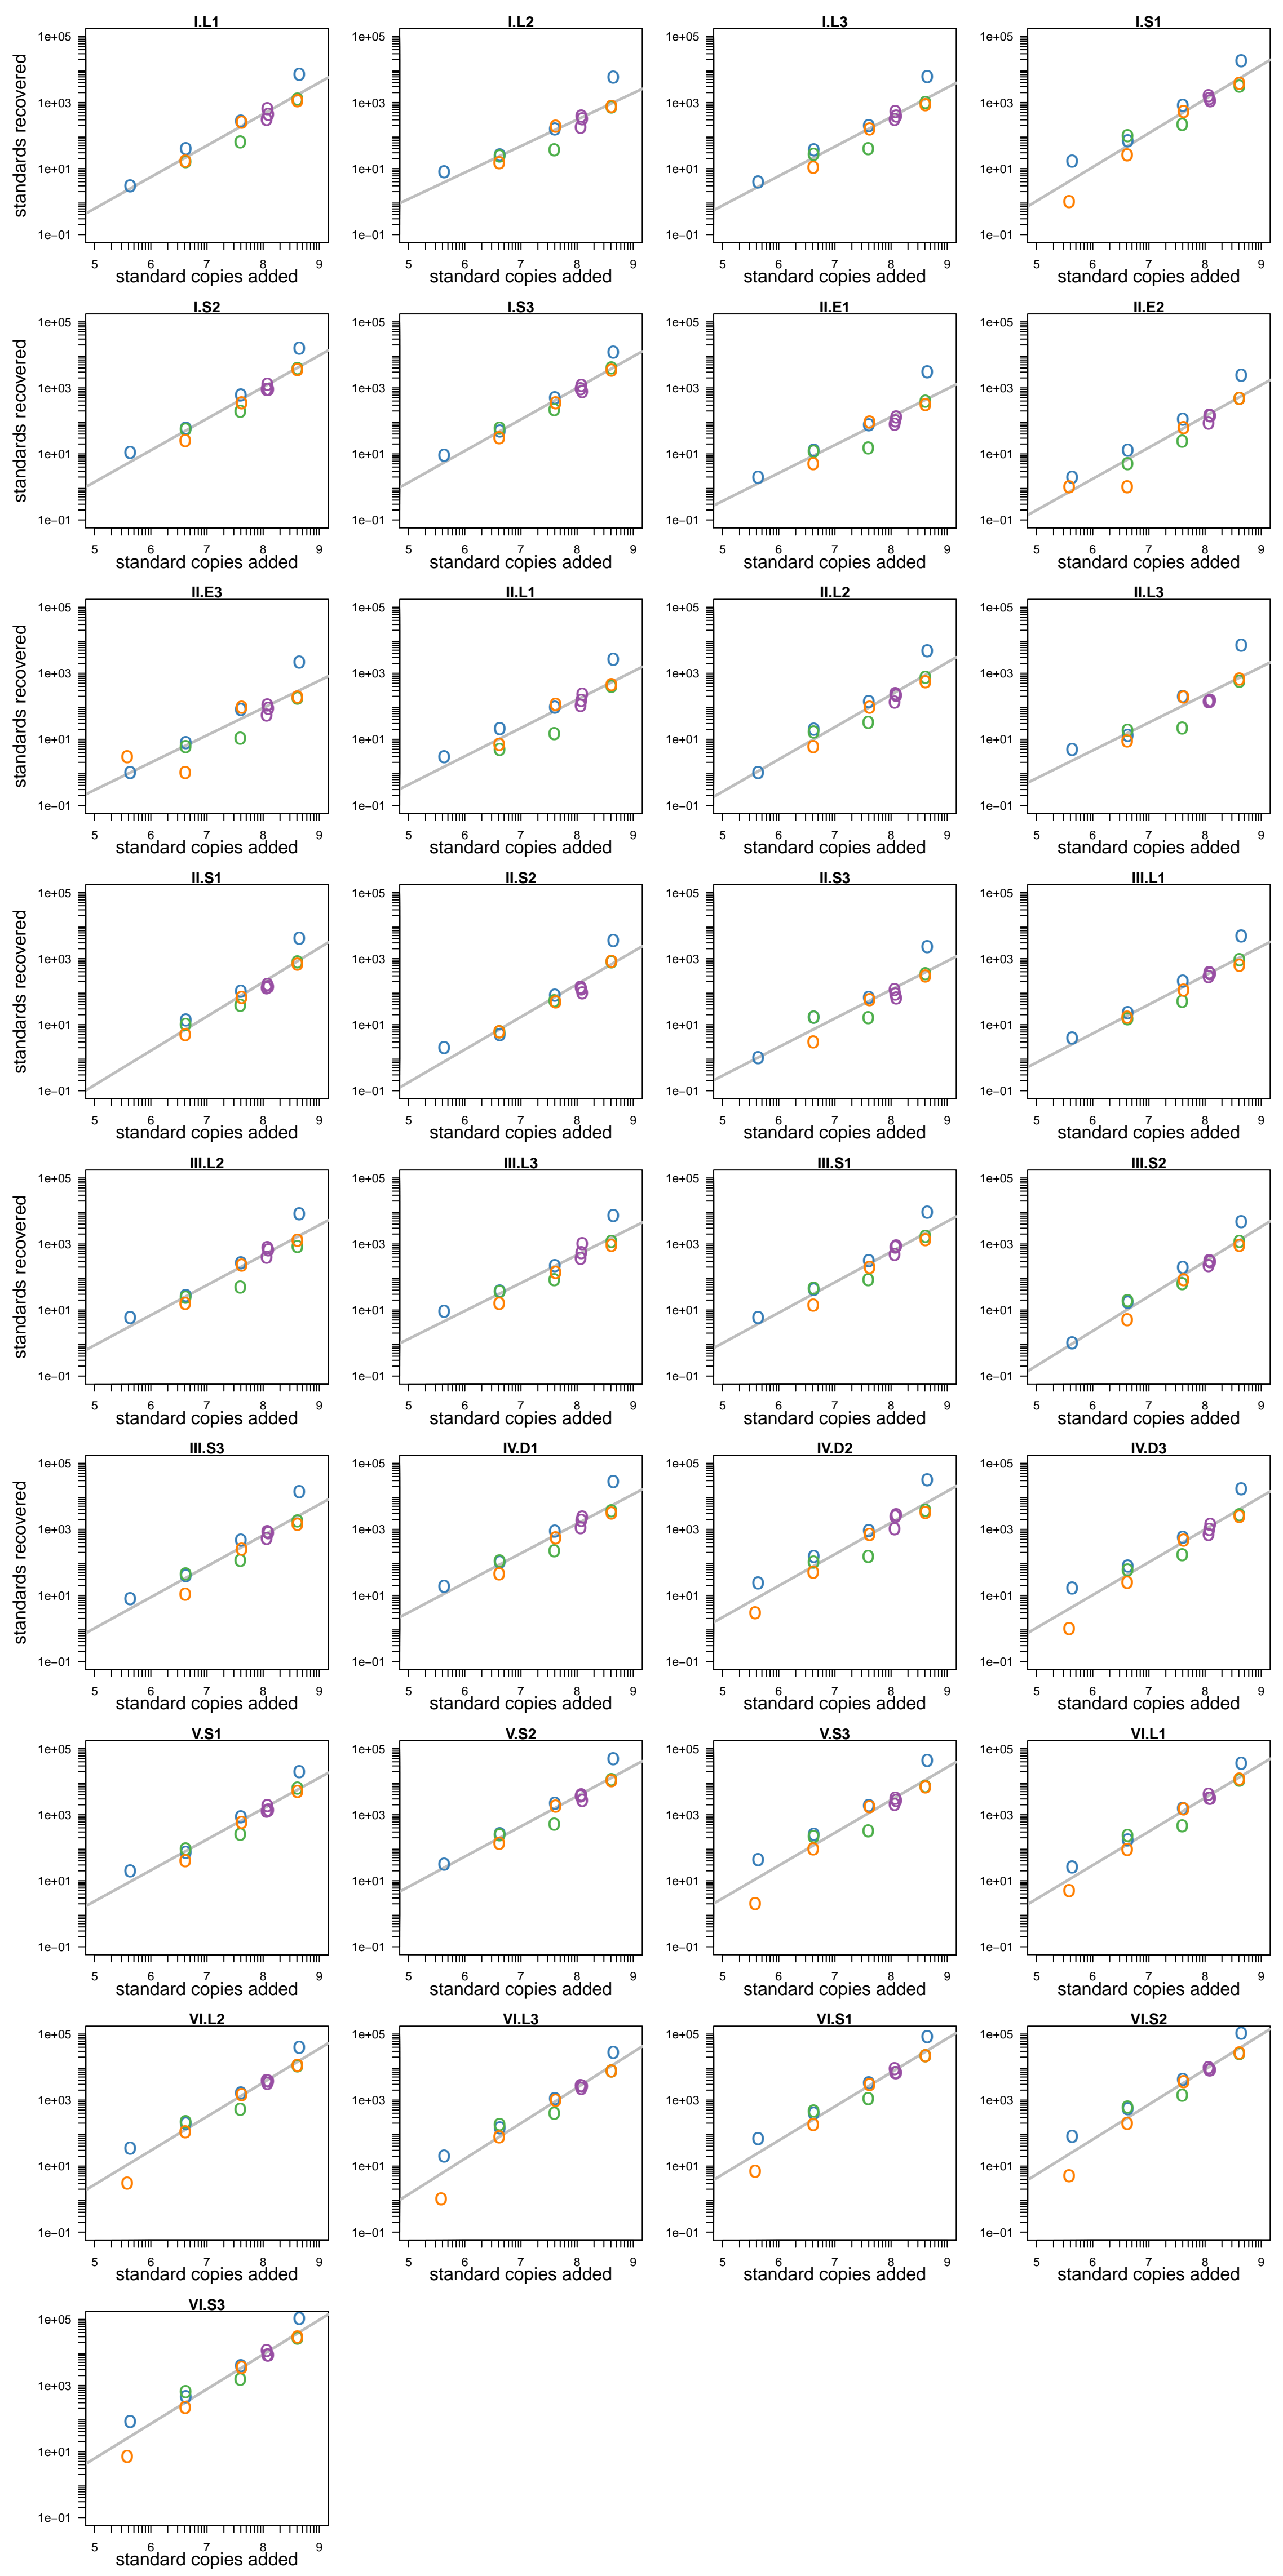

Supplement: mbo006163064sf2.pdf [file mbo006163064sf2.pdf]
